# Supplementary material for: New insights on the prevalence of drizzle in marine stratocumulus clouds based on a machine learning algorithm applied to radar Doppler spectra
Source: Copernicus journal article supplement (doi:10.5194/acp-22-7405-2022), 2022-06-09
Supplement: Supplementary file 1 [file acp-22-7405-2022-supplement.pdf]

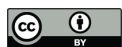

*Supplement of*

## **New insights on the prevalence of drizzle in marine stratocumulus clouds based on a machine learning algorithm applied to radar Doppler spectra**

**Zeen Zhu et al.**

*Correspondence to:* Zeen Zhu (zeen.zhu@stonybrook.edu)

The copyright of individual parts of the supplement might differ from the article licence.

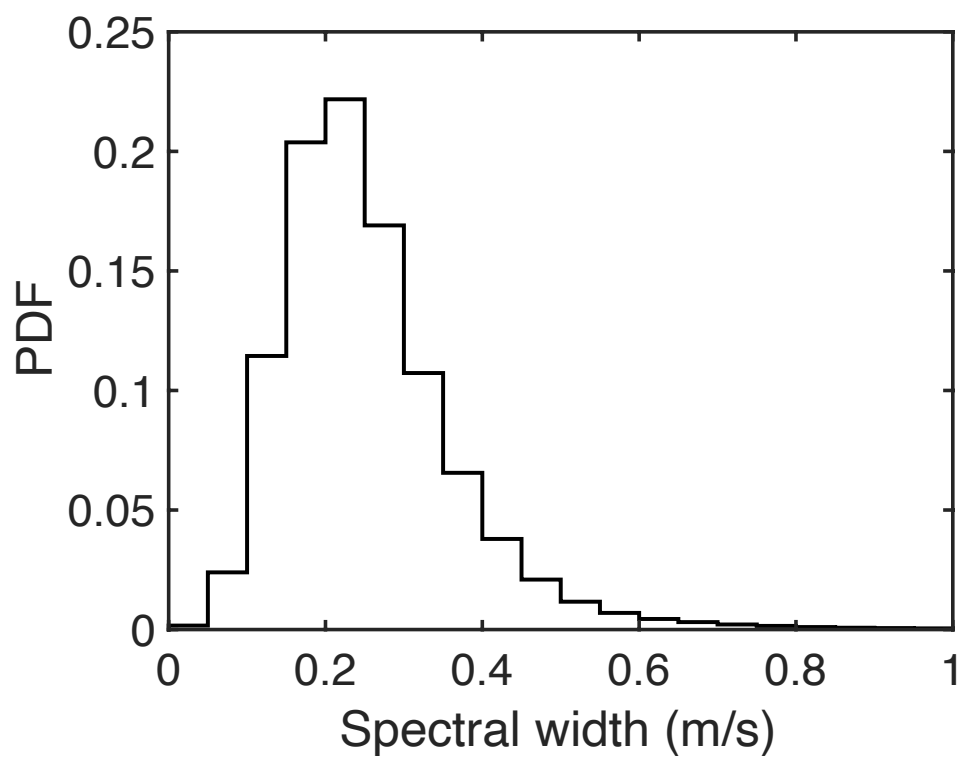

Figure S1: PDF of KAZR-observed spectrum width with reflectivity  $< -20$  dBZ collected from the ACE-ENA IOP1 campaign.

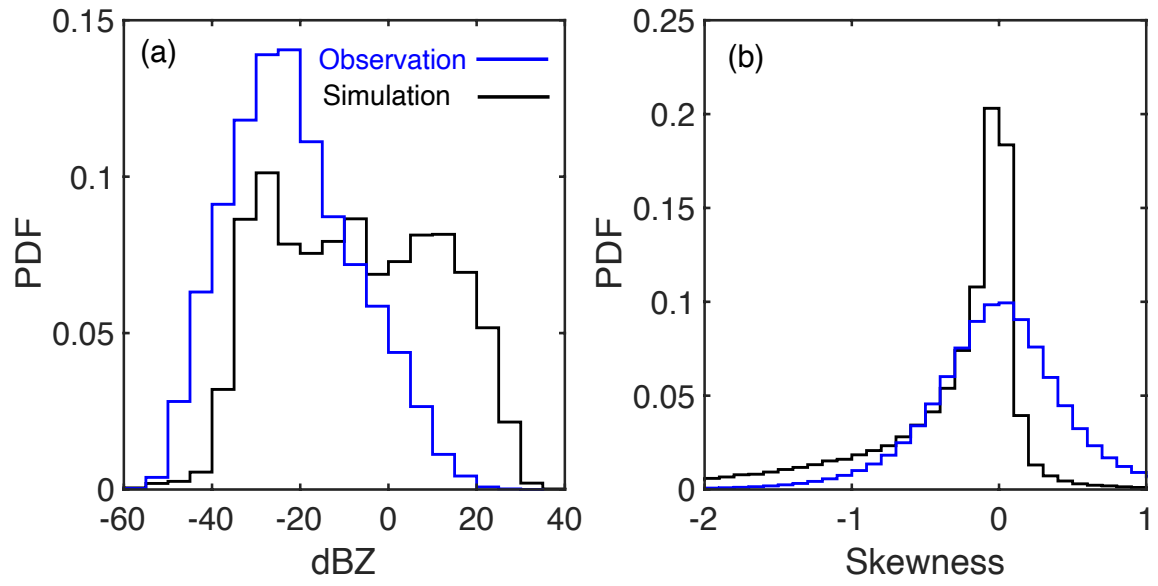

Figure S2: PDF of reflectivity (a) and skewness (b) from radar observation (blue line) and from the Doppler simulator (black line) with the setting indicated in the manuscript. The in-situ measurements and radar observation are obtained from ACE-ENA IOP1.

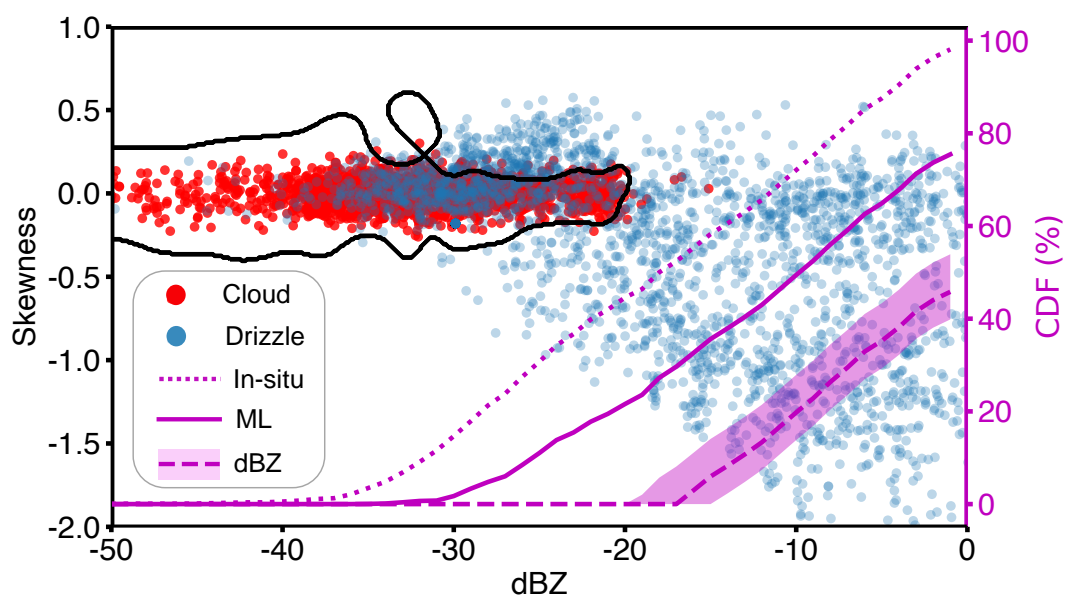

Figure S3: Same as Fig.2 but with  $C = 50$  and ! ! " ! # \$ %

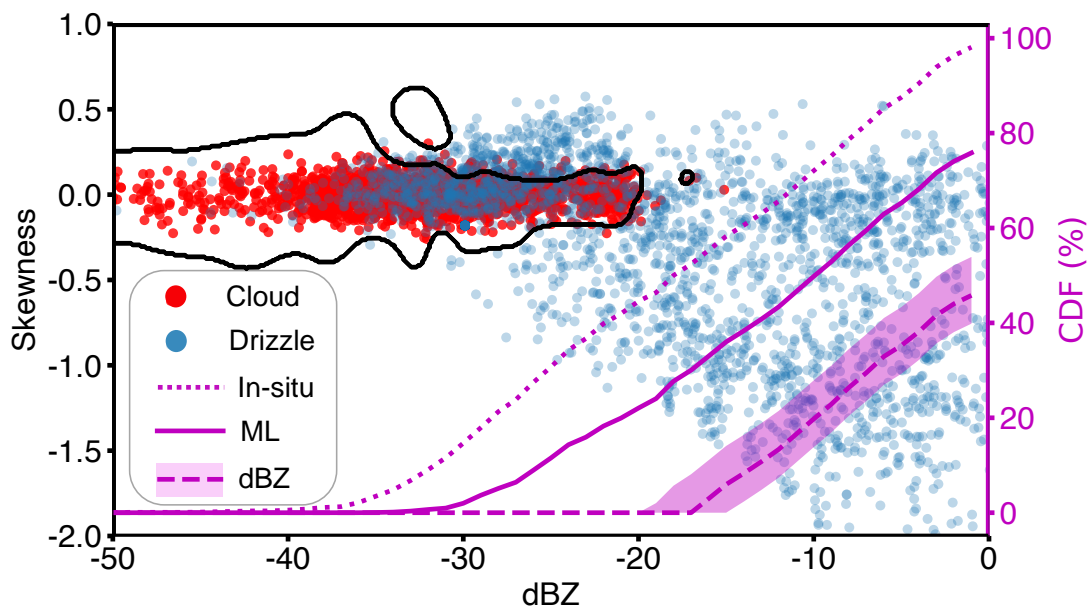

Figure S4: Same as Fig.2 but with  $C = 100$  and ! ! " ! # \$ %



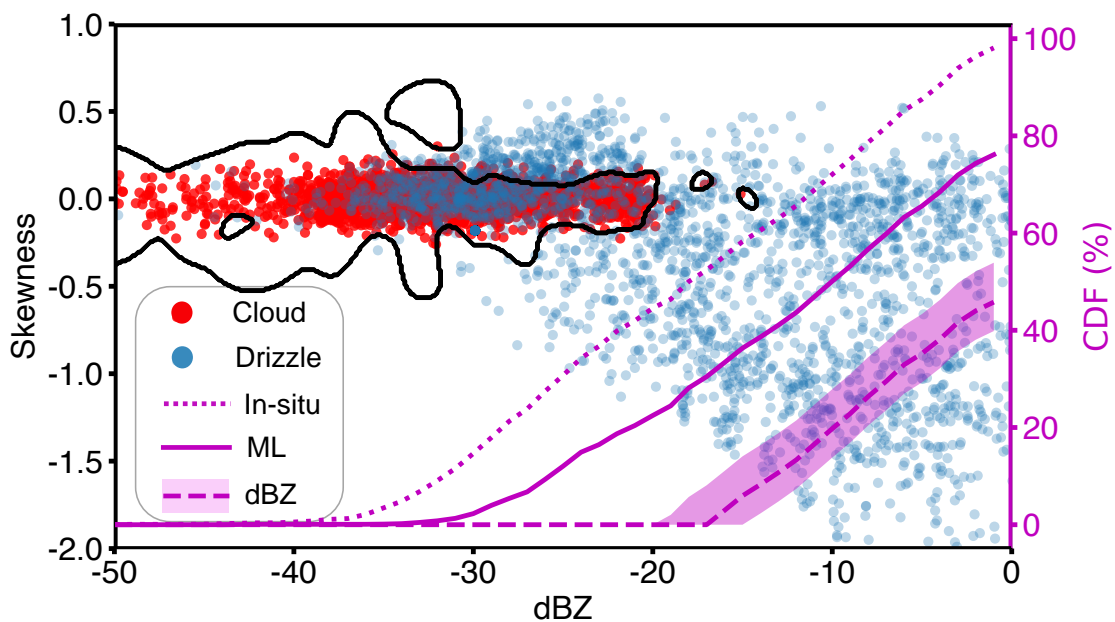

Figure S5: Same as Fig.2 but with  $C = 1000$  and !!"!#\$%

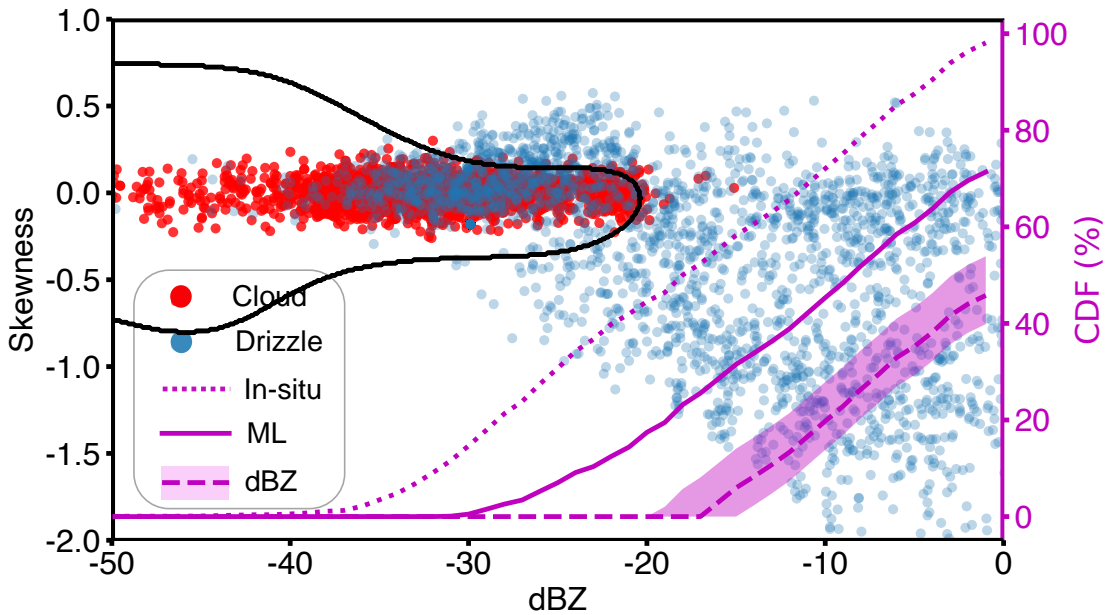

Figure S6: Same as Fig.2 but with  $C = 1$  and !!"!&%

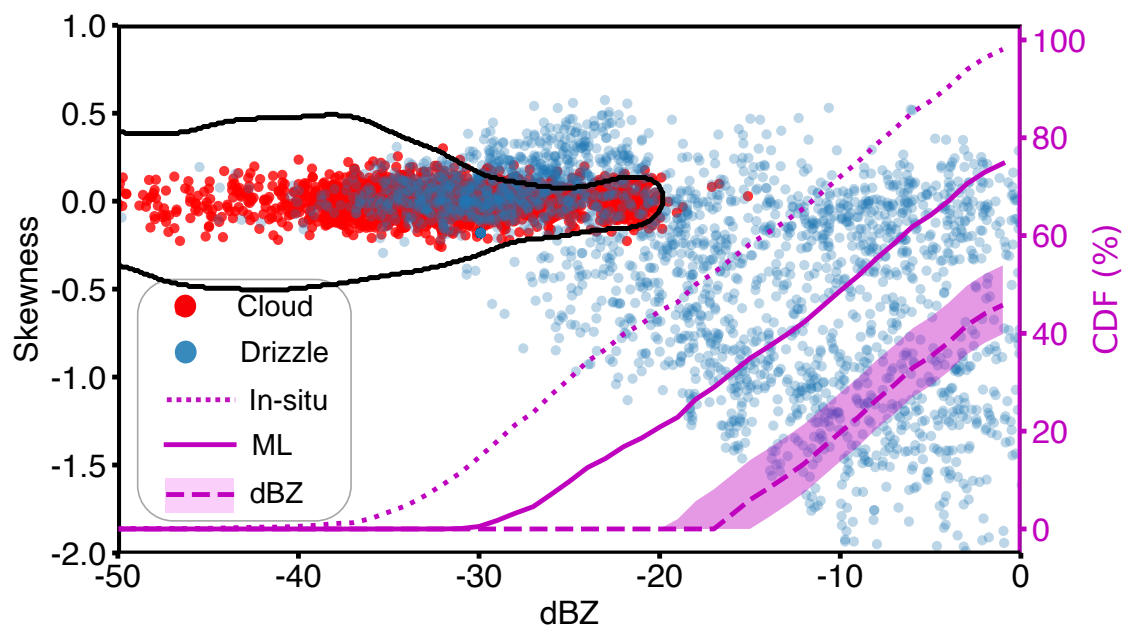

Figure S7: Same as Fig.2 but with  $C = 1$  and !!"!&\$%

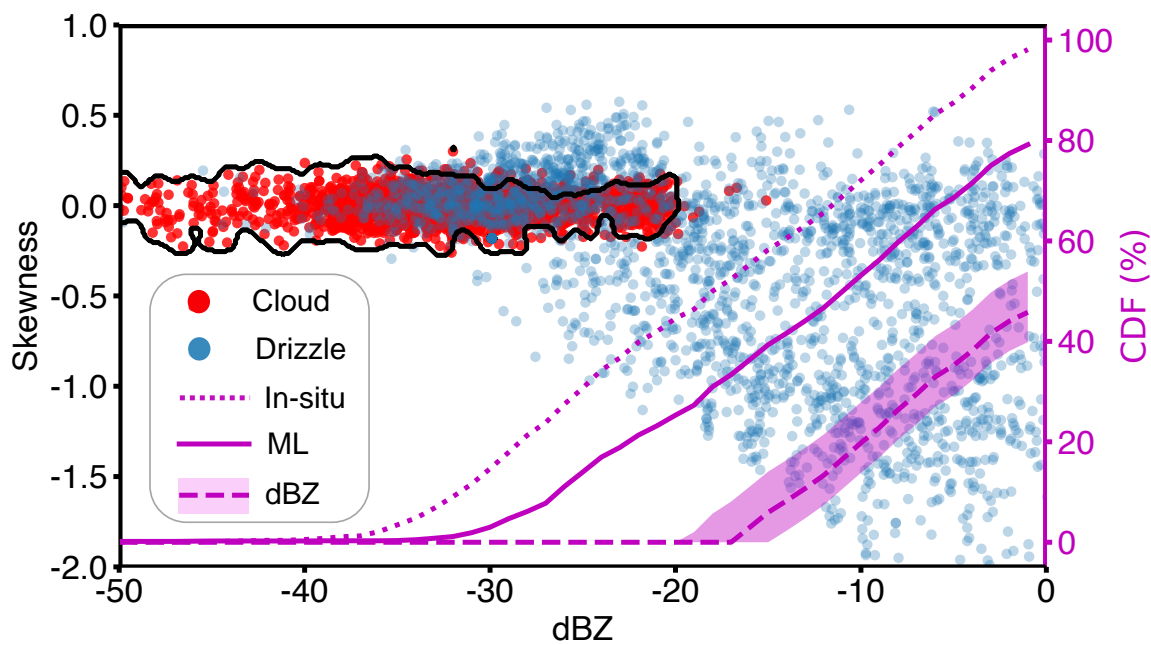

Figure S8: Same as Fig.2 but with  $C = 1$  and !!"!'\$\$\$%

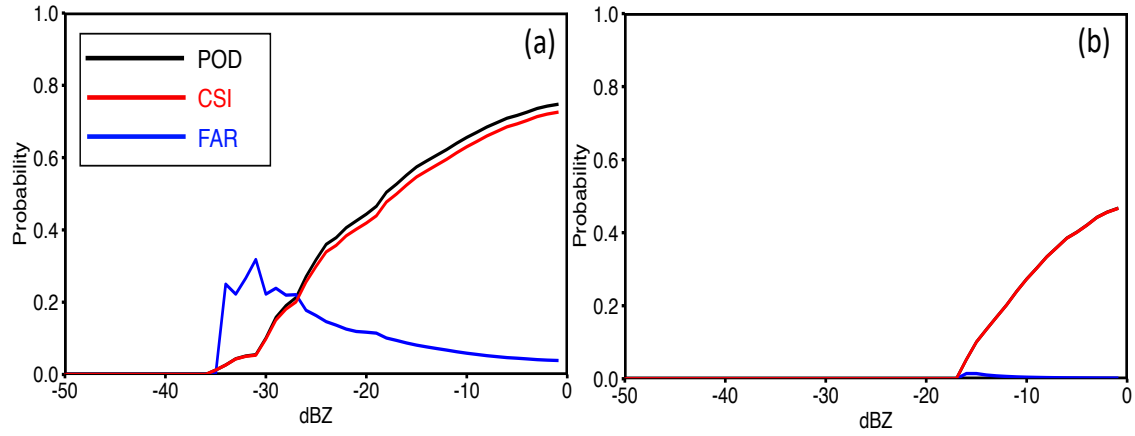

Figure S9: (a) Probability of detection (POD), False alarm ratio (FAR) and Critical success index (CSI) as a function of reflectivity for the ML-based drizzle detection algorithm. (b) Same as (a) but for the conventional method with reflectivity  $>-17\text{dBZ}$ .

POD, CSI and FAR are estimated as follows:

$$POD = \frac{TP}{TP + FN}$$

$$CSI = \frac{TP}{TP + FN + FP}$$

$$FAR = \frac{FP}{TP + FP}$$

Where TP, FN and FP represents True positive (i.e. the signal is labeled as drizzle and is detected as drizzle); False Negative (i.e. the signal is labeled as drizzle but is detected as cloud) and False Positive (i.e. the signal is labeled as cloud but is detected as drizzle).
